# Supplementary material for: Contribution of Argentinian B Corporations to Sustainable Development Goals: Empirical Analysis Based on Their Practices and Solutions to Socioenvironmental Problems
Source: Preprints.org preprint supplement (doi:10.20944/preprints202309.1949.v1), 2023-09-28
Supplement: Supplementary file 1 [file supplementary]

# CERTIFICATE OF ENGLISH EDITING

This document certifies that the paper listed below has been edited to ensure that the language is clear and free of errors. The logical presentation of ideas and the structure of the paper were also checked during the editing process. The edit was performed by professional editors at Editage, a division of Cactus Communications, in cooperation with Taylor & Francis Group. The intent of the author's message was not altered in any way during the editing process. The quality of the edit has been guaranteed, with the assumption that our suggested changes have been accepted and have not been further altered without the knowledge of our editors.

## Title

Contribution of Argentinian B Corporations to Sustainable Development Goals . Empirical analysis based on their practices and solutions to socioenvironmental problems

## Authors

Cecilia Ficco, Paola Bersía, Cecilia Bressan, Edila Herrera-Rodríguez

## Order No.

EDHER\_3

**EDITINGSERVICES**  
Supporting Taylor & Francis authors

Signature

Prabh Grewal,  
Vice President, Operations,  
Editage

Date of Issue

**September 15, 2023**

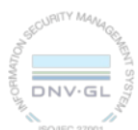

**editage**

**Taylor & Francis Editing Services**

[www.tandfeditingservices.com](http://www.tandfeditingservices.com)  
[support@tandfeditingservices.com](mailto:support@tandfeditingservices.com)
